# Supplementary material for: Isoleucine increases muscle mass through promoting myogenesis and intramyocellular fat deposition
Source: Royal Society of Chemistry journal article supplement (doi:10.1039/d0fo02156c), 2020-11-16
Supplement: d0fo02156c5.pdf [file d0fo02156c5.pdf]

Table S1. 60% High Fat Diet for Diet-induced Obesity

| raw material       | g/Kg  |
|--------------------|-------|
| Casein             | 267   |
| Maltodextrin       | 157   |
| Sucrose            | 89    |
| Soybean Oil        | 33    |
| Lard               | 301   |
| Cellulose          | 67    |
| Mineral Mix, M1020 | 66    |
| Vitamin Mix, V1010 | 13    |
| L-Cystine          | 4     |
| Choline Bitartrate | 3     |
| TBHQ               | 0.067 |
| Total              | 1000  |
