# Supplementary material for: Isoleucine increases muscle mass through promoting myogenesis and intramyocellular fat deposition
Source: Royal Society of Chemistry journal article supplement (doi:10.1039/d0fo02156c), 2020-11-16
Supplement: d0fo02156c6.pdf [file d0fo02156c6.pdf]

Table S2. The primers used for real-time quantification PCR

| Gene           | Primer sequence<br>(5'to 3') | NCBI Reference<br>Sequence | Product size<br>(bp) | amplification<br>efficiency |
|----------------|------------------------------|----------------------------|----------------------|-----------------------------|
| COX2           | F: CCGTGGGGAATGTATGAGCA      | NM_011198.4                | 204                  | 1.00                        |
|                | R: CTTCGCAGGAAGGGGATGTT      |                            |                      |                             |
| CS             | F: CAGCTACAGAAGGAAGTTGG      | XM_030244861.1             | 136                  | 0.97                        |
|                | R: AGGAATAGCGAGGGTCAGTC      |                            |                      |                             |
| PGC-1 $\alpha$ | F: AGCCGTGACCACTGACAACGAG    | XM_006503775.2             | 168                  | 0.97                        |
|                | R: GCTGCATGGTTCTGAGTGCTAAG   |                            |                      |                             |
| TFAM           | F: AAAGCTAAACACCCAGATGC      | NM_009360.4                | 81                   | 0.96                        |
|                | R: TTCTGCTTCTGGTAGCTCC       |                            |                      |                             |
| GAPDH          | F: TGCCGCCTGGAGAAACC         | XM_036165840.1             | 121                  | 0.99                        |
|                | R: TGAAGTCGCAGGAGACAACC      |                            |                      |                             |
| PPAR $\gamma$  | F: CCAAGAATACCAAAGTGCATCA    | NM_001127330.2             | 133                  | 0.97                        |
|                | R: CCCACAGACTCGGCACTCAAT     |                            |                      |                             |
| aP2            | F: AAGAAGTGGGAGTGGGCTTTG     | NM_024406.3                | 184                  | 0.97                        |
|                | R: CTCTTCACCTTCTGTCGTCTG     |                            |                      |                             |
| ATGL           | F: TTCGCAATCTCTACCGCCTC      | NM_001163689.1             | 136                  | 0.97                        |
|                | R: AAAGGGTTGGGTTGGTTCAG      |                            |                      |                             |
| HSL            | F: GCTGGGCTGTCAAGCACTGT      | NM_010719.5                | 160                  | 0.98                        |
|                | R: GTAAGTGGGTAGGCTGCCAT      |                            |                      |                             |
| LPL            | F: CCAATGGAGGCACTTTCCA       | NM_008509.2                | 85                   | 0.96                        |
|                | R: TGGTCCACGTCTCCGAGTC       |                            |                      |                             |
