# Supplementary figures and images for: Isoleucine increases muscle mass through promoting myogenesis and intramyocellular fat deposition
Source: Royal Society of Chemistry journal article supplement (doi:10.1039/d0fo02156c), 2020-11-16

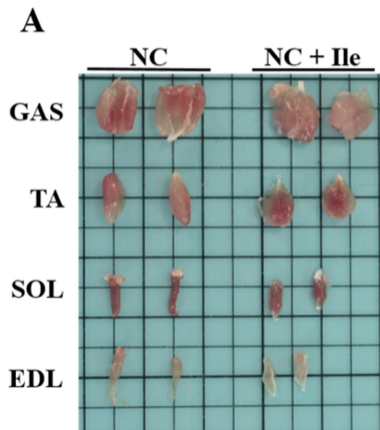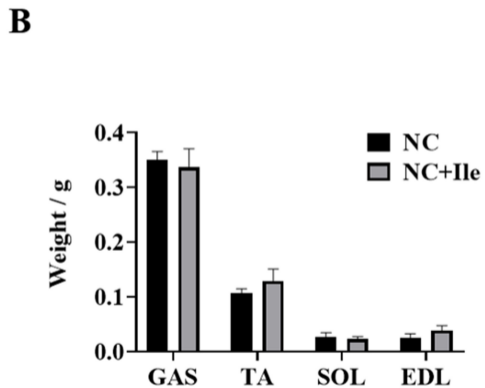

Supplement: d0fo02156c3.pdf [file d0fo02156c3.pdf]
